# Supplementary material
Source: HighWire-hosted journal article supplement (http://www.annfammed.org/highwire/filestream/611/field_highwire_adjunct_files/0/Charles_Supp_App.pdf)

Supplemental materials for:

Pariser P, Pham T, Brown JB, Stewart M, Charles J. Connecting people with multimorbidity to interprofessional teams using telemedicine. *Ann Fam Med.* 2019;17(Suppl\_1):S57-S62.

## Supplemental Appendix 1

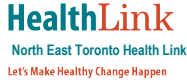

### Telemedicine IMPACT Plus (TIP) Patient/Caregiver Feedback

Your feedback is important to us! Please take a moment to share your thoughts on this experience. Please return your survey in the envelope; your responses will be kept strictly confidential and anonymous.

**Please indicate your agreement with each of the following statements:**

1. I am a:  patient  caregiver
2. I am confident that my/the patient's chronic care will be better managed as a result of the TIP case conference.  
 Strongly disagree  Disagree  Agree  Strongly agree
3. TIP has effectively improved my/the patient's access to new interdisciplinary resources.  
 Strongly disagree  Disagree  Agree  Strongly agree
4. I would use telemedicine technology again to facilitate a medical consultation.  
 Strongly disagree  Disagree  Agree  Strongly agree
5. I will help implement the recommendations given by the TIP interdisciplinary care team.  
 Strongly disagree  Disagree  Agree  Strongly agree
6. I am satisfied with the recommendations developed during the TIP case conference.  
 Strongly disagree  Disagree  Agree  Strongly agree
7. I am hopeful that my/my the patient's chronic condition will improve as a result of the TIP case conference.  
 Strongly disagree  Disagree  Agree  Strongly agree
8. I am hopeful that my/the patient's care will improve in the next 6 months as a result of the TIP case conference.  
 Strongly disagree  Disagree  Agree  Strongly agree
9. Patient only: estimate the number of times you visited the emergency department in the last 6 months: \_\_\_\_
10. Patient only: estimate the number of times you were admitted to hospital in the last 6 months: \_\_\_\_
11. What did you value most about the TIP experience?  
\_\_\_\_\_  
\_\_\_\_\_

12. What would you suggest we improve about the TIP experience for future patients?  
\_\_\_\_\_  
\_\_\_\_\_

**Thank you for your feedback!**

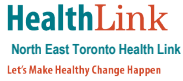

### Telemedicine IMPACT Plus (TIP) Family Physician Feedback

Your feedback is important to us! Please take a moment to share your thoughts on this experience. Please return your survey in the envelope; your responses will be kept strictly confidential and anonymous.

**Please indicate your agreement with each of the following statements:**

1. The TIP case conference increased my confidence in managing this patient's chronic care.  
 Strongly disagree    Disagree    Agree    Strongly agree
  
2. Telemedicine technology added to the team's collaborative approach in the TIP case conference.  
 Strongly disagree    Disagree    Agree    Strongly agree
  
3. I would use telemedicine technology again to facilitate a case conference.  
 Strongly disagree    Disagree    Agree    Strongly agree
  
4. TIP has effectively improved my access to new interdisciplinary resources.  
 Strongly disagree    Disagree    Agree    Strongly agree
  
5. I am satisfied with the recommendations developed during the TIP case conference.  
 Strongly disagree    Disagree    Agree    Strongly agree
  
6. I am hopeful that this patient's care will improve in the next six months as a result of the TIP case conference.  
 Strongly disagree    Disagree    Agree    Strongly agree

7. What did you value most about the TIP experience?

---

---

8. What would you suggest we improve about the TIP experience for future patients?

---

---

**Thank you for your feedback!**

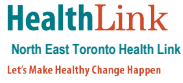

**Telemedicine IMPACT Plus (TIP)  
Interdisciplinary Care Team Feedback**

Your feedback is important to us! Please take a moment to share your thoughts on this experience.  
Please return your survey in the envelope; your responses will be kept strictly confidential and anonymous.

**Please indicate your agreement with each of the following statements:**

- 1. The TIP case conference was an effective model to develop a care plan for this complex patient.  
 Strongly disagree    Disagree    Agree    Strongly agree
  
- 2. Telemedicine technology added to the team’s collaborative approach in the TIP case conference.  
 Strongly disagree    Disagree    Agree    Strongly agree
  
- 3. I would use telemedicine technology again to facilitate a case conference.  
 Strongly disagree    Disagree    Agree    Strongly agree
  
- 4. I am hopeful that this patient’s care will improve in the next six months as a result of the TIP case conference.  
 Strongly disagree    Disagree    Agree    Strongly agree

5. What did you value most about the TIP experience?

---

---

6. What would you suggest we improve about the TIP experience for future patients?

---

---

**Thank you for your feedback!**

**Supplemental Figure 1: Telemedicine IMPACT PLUS Platform.** The TIP model includes: full participation of the patient and PCP, a TIP nurse (case manager), and an interprofessional team including specialists with the use of advanced technology. .

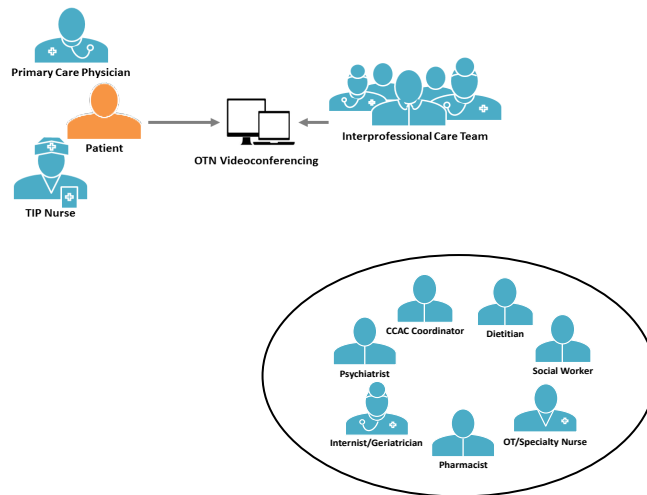

Supplement: Charles_Supp_App.pdf [file Charles_Supp_App.pdf]
